# Supplementary material for: Mechanistic Model of Rothia mucilaginosa Adaptation toward Persistence in the CF Lung, Based on a Genome Reconstructed from Metagenomic Data
Source: PLOS journal article supplement (doi:10.1371/journal.pone.0064285), 2013-05-30
Supplement: S1 (10.1371/journal.pone.0064285.s001) [file journal.pone.0064285.s001]

Base position in CF1E

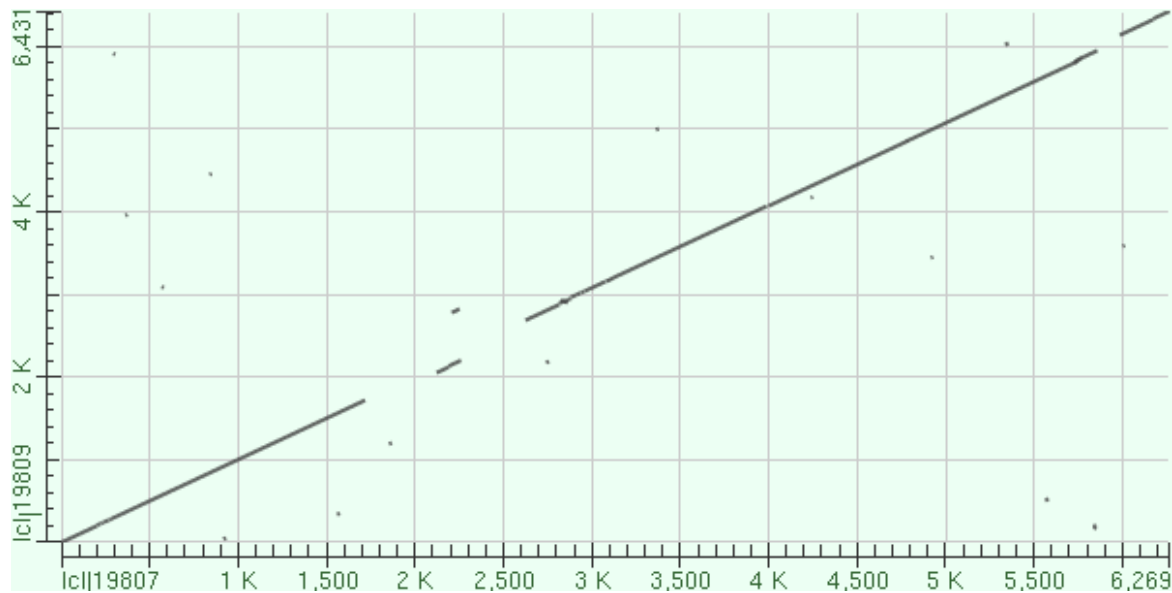

Base position in DY-18
