# Supplementary material for: Mechanistic Model of Rothia mucilaginosa Adaptation toward Persistence in the CF Lung, Based on a Genome Reconstructed from Metagenomic Data
Source: PLOS journal article supplement (doi:10.1371/journal.pone.0064285), 2013-05-30
Supplement: S3 (10.1371/journal.pone.0064285.s003) [file journal.pone.0064285.s003]

| Patient ID<br>(Gender, Age) | Time Point | Time Line<br>(Day) | Health Status  |
|-----------------------------|------------|--------------------|----------------|
| CF1<br>(Male, 38)           | D          | 0                  | Exacerbation   |
|                             | E          | 14                 | On Treatment   |
|                             | F          | 33                 | Post Treatment |
| CF4<br>(Male, N/A)          | A          | 0                  | Exacerbation   |
|                             | B          | 11                 | Post Treatment |
|                             | C          | 58                 | Stable         |
| CF5<br>(Female, N/A)        | A          | 0                  | Exacerbation   |
|                             | B          | 21                 | Post Treatment |
| CF6<br>(Female, 39)         | A          | 0                  | Exacerbation   |
|                             | B          | 12                 | On Treatment   |
|                             | C          | 17                 | Post Treatment |
|                             | D          | 46                 | Stable         |
| CF7<br>(Male, 36)           | A          | 0                  | Exacerbation   |
|                             | B          | 20                 | On Treatment   |
|                             | C          | 27                 | On Treatment   |
|                             | D          | 37                 | Post Treatment |
| CF8<br>(Male, 26)           | A          | 0                  | Exacerbation   |
|                             | B          | 17                 | Post Treatment |
