# Supplementary material for: Mechanistic Model of Rothia mucilaginosa Adaptation toward Persistence in the CF Lung, Based on a Genome Reconstructed from Metagenomic Data
Source: PLOS journal article supplement (doi:10.1371/journal.pone.0064285), 2013-05-30
Supplement: S8 (10.1371/journal.pone.0064285.s008) [file journal.pone.0064285.s008]

|           | Nucleotide level Identity against DY-18 (%) | Protein level Identity against DY-18 (%) |
|-----------|---------------------------------------------|------------------------------------------|
| Subunit R | 81                                          | 75                                       |
| Subunit M | 87                                          | 88                                       |
| Subunit S | 37                                          | 41                                       |
