# Supplementary material for: Mechanistic Model of Rothia mucilaginosa Adaptation toward Persistence in the CF Lung, Based on a Genome Reconstructed from Metagenomic Data
Source: PLOS journal article supplement (doi:10.1371/journal.pone.0064285), 2013-05-30
Supplement: S13 (10.1371/journal.pone.0064285.s013) [file journal.pone.0064285.s013]

| Name                                                                | Insertion site | region size |
|---------------------------------------------------------------------|----------------|-------------|
| hypothetical protein CDS                                            | 53748          | 3174        |
| Phage lysin, N-acetylmuramoyl-L-alanine amidase CDS                 |                |             |
| Modulator of drug activity B CDS                                    | 65967          | 913         |
| Putative DNA-binding protein CDS                                    | 70542          | 1534        |
| hypothetical protein CDS                                            | 92872          | 1160        |
| hypothetical protein CDS                                            | 111545         | 710         |
| hypothetical protein CDS                                            | 119455         | 1338        |
| predicted nucleic acid-binding protein CDS                          | 156926         | 1615        |
| hypothetical protein CDS                                            |                |             |
| putative hydrolase CDS                                              | 239949         | 1690        |
| hypothetical protein CDS                                            | 374555         | 1065        |
| acyltransferase 3 CDS                                               | 613830         | 2685        |
| hypothetical protein CDS                                            | 625770         | 945         |
| hypothetical protein CDS                                            | 686303         | 719         |
| Mobile element protein CDS                                          | 808,821        | 318         |
| hypothetical protein CDS                                            | 992646         | 3146        |
| DNA-cytosine methyltransferase (EC 2.1.1.37) CDS                    |                |             |
| hypothetical protein CDS                                            |                |             |
| 2-oxoglutarate/malate translocator CDS                              | 1013016        | 1866        |
| putative helicase CDS                                               | 1084123        | 5306        |
| putative helicase CDS                                               |                |             |
| hypothetical protein CDS                                            |                |             |
| FIG01029049: hypothetical protein CDS                               | 1383788        | 1489        |
| hypothetical protein CDS                                            |                |             |
| hypothetical protein CDS                                            | 1392429        | 754         |
| PE-PGRS FAMILY PROTEIN CDS                                          | 1434185        | 4251        |
| hypothetical protein CDS                                            | 1464431        | 1830        |
| Mercuric ion reductase (EC 1.16.1.1) CDS                            | 1671908        | 1271        |
| Macrolide export ATP-binding/permease protein MacB (EC 3.6.3.-) CDS | 1671564        | 3475        |
| hypothetical protein CDS                                            |                |             |
| hypothetical protein CDS                                            | 1788171        | 2192        |
| hypothetical protein CDS                                            |                |             |
| hypothetical protein CDS                                            | 1790071        | 2205        |
| hypothetical protein CDS                                            |                |             |
| hypothetical protein CDS                                            | 1817923        | 1800        |
| Mobile element protein CDS                                          | 1884458        | 1840        |
| L-lactate dehydrogenase (EC 1.1.2.3) CDS                            | 2044067        | 1547        |
| Flagellar hook-length control protein fliK CDS                      | 1924657        | 966         |
| hypothetical protein CDS                                            | 2000796        | 1310        |
